# Supplementary material for: A Phase II Trial of Rivoceranib, an Oral Vascular Endothelial Growth Factor Receptor 2 Inhibitor, for Recurrent or Metastatic Adenoid Cystic Carcinoma
Source: PubMed Central journal article supplement — Clin Cancer Res. 2023 Aug 29;29(22):4555–63. doi: 10.1158/1078-0432.CCR-23-1030 (PMC10643996; doi:10.1158/1078-0432.ccr-23-1030), 2023-08-29
Supplement: ccr-23-1030_figure_s2_suppfs2.pdf [file ccr-23-1030_figure_s2_suppfs2.pdf]

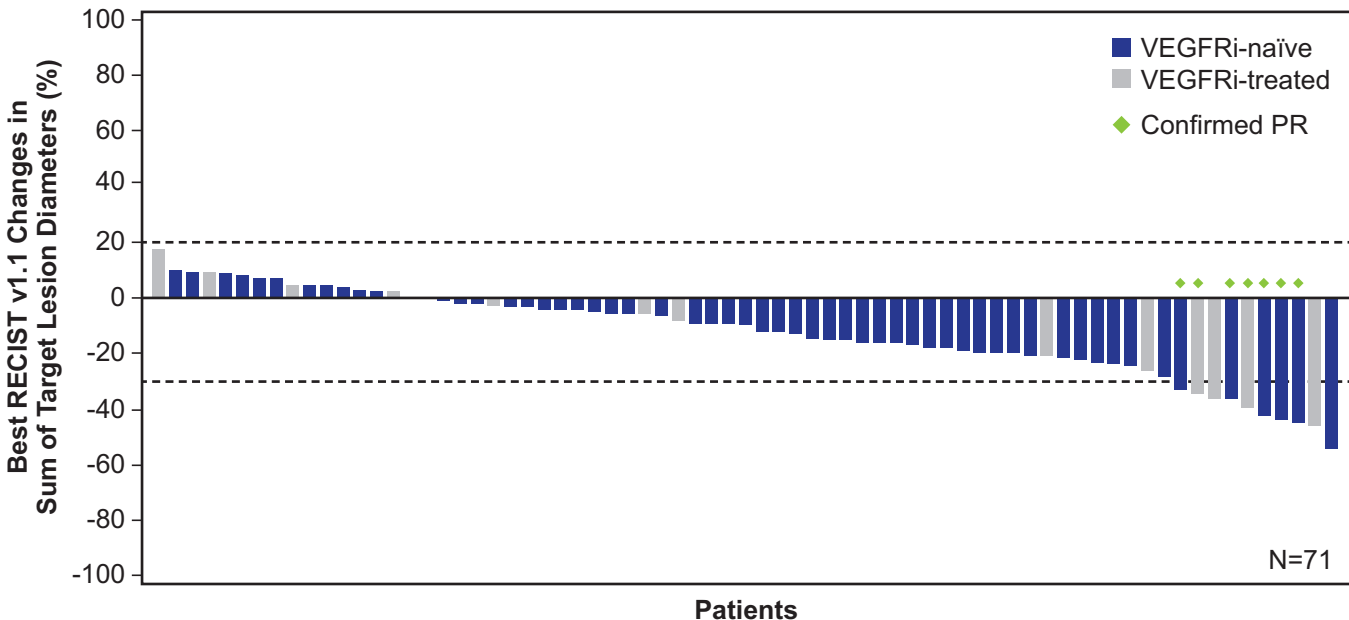

**Figure S2. Waterfall plot depicting tumor responses assessed by RECIST criteria per blinded independent review committee in the efficacy evaluable population.** Maximum change in sum of target lesions in 71 evaluable patients (1 patient did not have a post-baseline assessment for the target lesion in the central review dataset; therefore, this patient is excluded from the BIRC waterfall plot). RECIST, Response Criteria in Solid Tumors; VEGFRi, vascular endothelial growth factor receptor inhibitor.
