# Supplementary material for: A Phase II Trial of Rivoceranib, an Oral Vascular Endothelial Growth Factor Receptor 2 Inhibitor, for Recurrent or Metastatic Adenoid Cystic Carcinoma
Source: PubMed Central journal article supplement — Clin Cancer Res. 2023 Aug 29;29(22):4555–63. doi: 10.1158/1078-0432.CCR-23-1030 (PMC10643996; doi:10.1158/1078-0432.ccr-23-1030), 2023-08-29
Supplement: ccr-23-1030_figure_s3_suppfs3.pdf [file ccr-23-1030_figure_s3_suppfs3.pdf]

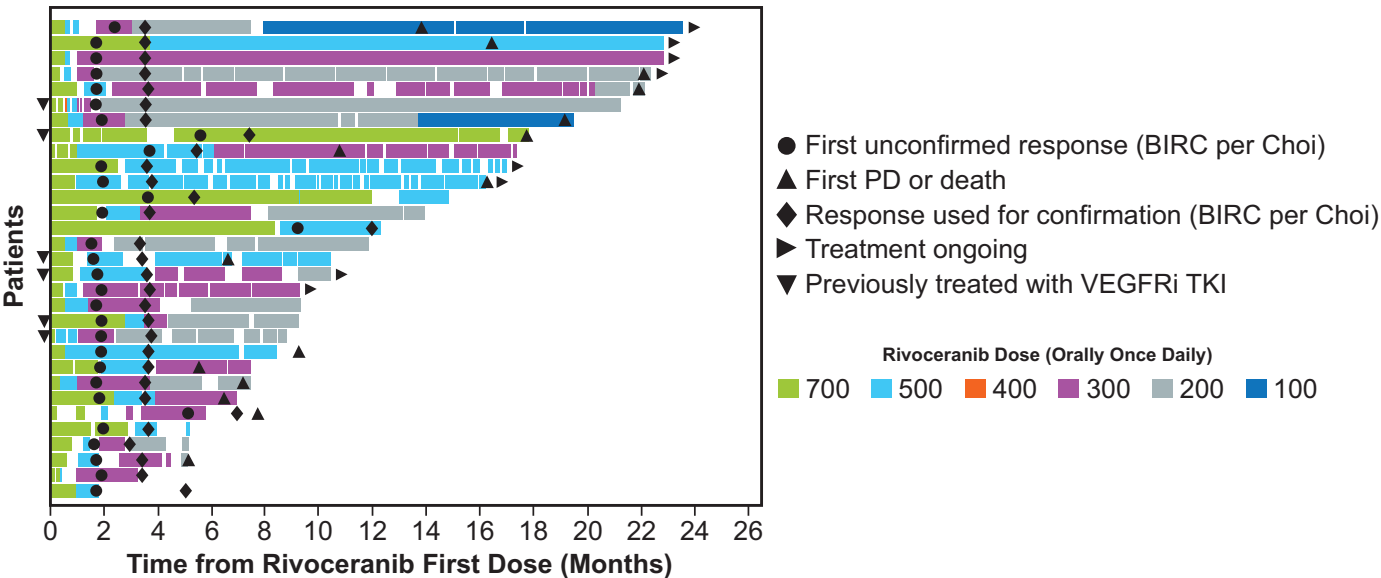

**Figure S3. Swimmer plot depicting duration of response among patients with response assessed by Choi criteria per blinded independent review committee in the efficacy evaluable population.** Duration of treatment in patients with confirmed response. Each bar represents one patient. BIRC, blinded independent review committee; PD, progressive disease; VEGFRi, vascular endothelial growth factor receptor inhibitor.
