# Supplementary material for: A Phase II Trial of Rivoceranib, an Oral Vascular Endothelial Growth Factor Receptor 2 Inhibitor, for Recurrent or Metastatic Adenoid Cystic Carcinoma
Source: PubMed Central journal article supplement — Clin Cancer Res. 2023 Aug 29;29(22):4555–63. doi: 10.1158/1078-0432.CCR-23-1030 (PMC10643996; doi:10.1158/1078-0432.ccr-23-1030), 2023-08-29
Supplement: ccr-23-1030_figure_s4_suppfs4.pdf [file ccr-23-1030_figure_s4_suppfs4.pdf]

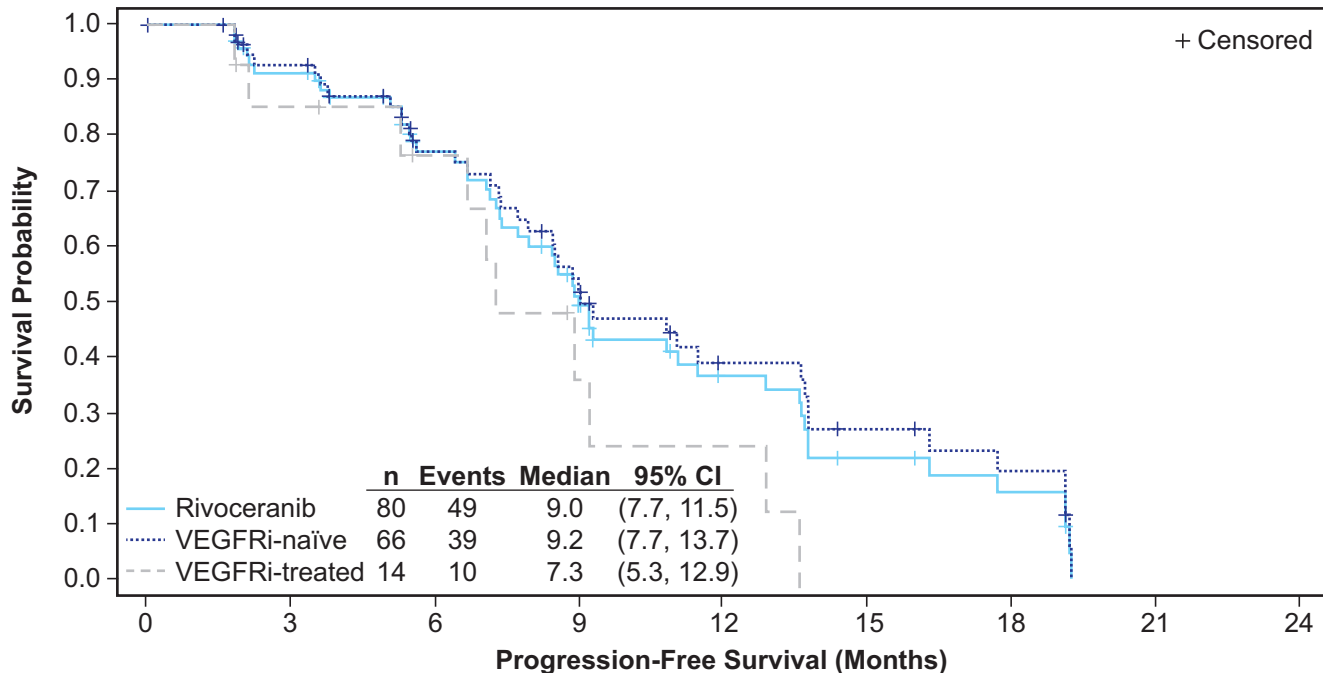

| No. at Risk    |    |    |    |    |    |   |   |   |
|----------------|----|----|----|----|----|---|---|---|
| Rivoceranib    | 80 | 62 | 45 | 28 | 15 | 8 | 5 | 0 |
| VEGFRi-naïve   | 66 | 51 | 37 | 25 | 13 | 8 | 5 | 0 |
| VEGFRi-treated | 14 | 11 | 8  | 3  | 2  | 0 |   |   |

**Figure S4. Kaplan-Meier estimate of progression-free survival by blinded independent review committee in the intention-to-treat population.** Progression-free survival assessed by blinded independent review committee by prior VEGFR inhibitor treatment.
