# Supplementary material for: A Phase II Trial of Rivoceranib, an Oral Vascular Endothelial Growth Factor Receptor 2 Inhibitor, for Recurrent or Metastatic Adenoid Cystic Carcinoma
Source: PubMed Central journal article supplement — Clin Cancer Res. 2023 Aug 29;29(22):4555–63. doi: 10.1158/1078-0432.CCR-23-1030 (PMC10643996; doi:10.1158/1078-0432.ccr-23-1030), 2023-08-29
Supplement: ccr-23-1030_table_s1_suppts1.pdf [file ccr-23-1030_table_s1_suppts1.pdf]

**Table S1. Representativeness of Study Participants with R/M ACC Patient Population**

| <b>Parameter</b>                        | <b>Study Information</b>                                                                                                                                                                                                                                                                                                                                                                                                       |
|-----------------------------------------|--------------------------------------------------------------------------------------------------------------------------------------------------------------------------------------------------------------------------------------------------------------------------------------------------------------------------------------------------------------------------------------------------------------------------------|
| Cancer type                             | Recurrent or metastatic adenoid cystic carcinoma (ACC) of any primary location                                                                                                                                                                                                                                                                                                                                                 |
| Considerations related to:              |                                                                                                                                                                                                                                                                                                                                                                                                                                |
| Sex                                     | The distribution of men versus women with ACC varies according to the original tumor site. Women represent 58% of the typical ACC population with salivary gland tumors. <sup>1</sup>                                                                                                                                                                                                                                          |
| Age                                     | Median age of the typical ACC population, is approximately 58 years. <sup>2</sup> However, the range of ages (28 to 76) represents a wide population representative of the variable ages of diagnosis observed in these patients. <sup>1</sup>                                                                                                                                                                                 |
| Race/ethnicity                          | Based on data from 2000-2016, the 16-year limited duration prevalence (per 100,000) of ACC in the United States was 3.24 for White patients, 3.07 for Black, 3.04 for Asian/Pacific Islander, and 1.13 for American Indian/Alaska Native. <sup>3</sup>                                                                                                                                                                         |
| Geography                               | ACC is a rare tumor. Approximately 1300 cases are diagnosed in the US each year and globally approximately 200,000 people are affected. <sup>4</sup>                                                                                                                                                                                                                                                                           |
| Other considerations                    | Due to the variable origins of ACC, the disease represents a population of variable sexes, ages, and ethnicities. Salivary gland origin occurs in the largest proportion of the population (73%) with breast as the next largest segment (13%). Patients with eye or orbit origins are younger at the time of diagnosis. Black women are overrepresented among the subset of patients with female genital tumors. <sup>1</sup> |
| Overall representativeness of the study | While our study enrolled predominantly patients with salivary gland ACC (92.5%), our study is generally representative of the population of patients with salivary gland ACC with slight tendencies toward a greater number of men and younger patients. Given the rarity of the tumor and resulting small sample sizes in clinical trials of this tumor type, some variation from the overall ACC population is expected.     |

1. Li N, Xu L, Zhao H, El-Naggar AK, Sturgis EM. A comparison of the demographics, clinical features, and survival of patients with adenoid cystic carcinoma of major and minor salivary glands versus less common sites within the Surveillance, Epidemiology, and End Results registry. *Cancer*. 2012;118:3945-53.

2. Spitz MR, Tilley BC, Batsakis JG, Gibeau JM, Newell GR. Risk factors for major salivary gland carcinoma. A case-comparison study. *Cancer*. 1984;54:1854-9.
3. Boyle TAC, St. Laurent S, Semus S, Joseph N. Epidemiology of adenoid cystic carcinoma in the United States. *J Clin Oncol*. 2020;38(15):e13600.
4. Cancer.Net. Adenoid cystic carcinoma: statistics. Updated March 2023. Accessed April 6, 2023. <https://www.cancer.net/cancer-types/adenoid-cystic-carcinoma/statistics#:~:text=How%20many%20people%20are%20diagnosed,200%2C000%20people%20have%20this%20disease>
