# Supplementary material for: A Phase II Trial of Rivoceranib, an Oral Vascular Endothelial Growth Factor Receptor 2 Inhibitor, for Recurrent or Metastatic Adenoid Cystic Carcinoma
Source: PubMed Central journal article supplement — Clin Cancer Res. 2023 Aug 29;29(22):4555–63. doi: 10.1158/1078-0432.CCR-23-1030 (PMC10643996; doi:10.1158/1078-0432.ccr-23-1030), 2023-08-29
Supplement: ccr-23-1030_table_s2_suppts2.pdf [file ccr-23-1030_table_s2_suppts2.pdf]

**Table S2. Adverse Events of Any Grade that Occurred in  $\geq 10\%$  of Patients [n (%)]**

|                                            | <b>Rivoceranib<br/>N=80</b> |
|--------------------------------------------|-----------------------------|
| Patients with any adverse event            | 80 (100.0)                  |
| Hypertension                               | 53 (66.3)                   |
| Fatigue                                    | 51 (63.8)                   |
| Headache                                   | 42 (52.5)                   |
| Nausea                                     | 42 (52.5)                   |
| Stomatitis                                 | 39 (48.8)                   |
| Diarrhoea                                  | 35 (43.8)                   |
| Decreased appetite                         | 32 (40.0)                   |
| Proteinuria                                | 31 (38.8)                   |
| Palmar-plantar erythrodysesthesia syndrome | 27 (33.8)                   |
| Weight decreased                           | 25 (31.3)                   |
| Constipation                               | 23 (28.8)                   |
| Aspartate aminotransferase increased       | 22 (27.5)                   |
| Back pain                                  | 20 (25.0)                   |
| Vomiting                                   | 20 (25.0)                   |
| Alanine aminotransferase increased         | 19 (23.8)                   |
| Abdominal pain                             | 17 (21.3)                   |
| Oral pain                                  | 17 (21.3)                   |
| Dyspnoea                                   | 17 (21.3)                   |
| Dysphonia                                  | 15 (18.8)                   |
| Dry mouth                                  | 13 (16.3)                   |
| Platelet count decreased                   | 13 (16.3)                   |
| Gastroesophageal reflux disease            | 13 (16.3)                   |
| Blood bilirubin increased                  | 12 (15.0)                   |
| Arthralgia                                 | 12 (15.0)                   |
| Rash                                       | 12 (15.0)                   |
| Musculoskeletal chest pain                 | 12 (15.0)                   |
| Epistaxis                                  | 11 (13.8)                   |
| Myalgia                                    | 10 (12.5)                   |
| Dyspepsia                                  | 10 (12.5)                   |
| Dizziness                                  | 10 (12.5)                   |
| Oropharyngeal pain                         | 10 (12.5)                   |
| Hypokalaemia                               | 10 (12.5)                   |
| Anaemia                                    | 10 (12.5)                   |
| Blood alkaline phosphatase increased       | 10 (12.5)                   |
| Cough                                      | 9 (11.3)                    |

|                  | <b>Rivoceranib<br/>N=80</b> |
|------------------|-----------------------------|
| Hyponatraemia    | 8 (10.0)                    |
| Hypothyroidism   | 8 (10.0)                    |
| Hypophosphatemia | 8 (10.0)                    |
