# Supplementary material for: A Phase II Trial of Rivoceranib, an Oral Vascular Endothelial Growth Factor Receptor 2 Inhibitor, for Recurrent or Metastatic Adenoid Cystic Carcinoma
Source: PubMed Central journal article supplement — Clin Cancer Res. 2023 Aug 29;29(22):4555–63. doi: 10.1158/1078-0432.CCR-23-1030 (PMC10643996; doi:10.1158/1078-0432.ccr-23-1030), 2023-08-29
Supplement: ccr-23-1030_table_s3_suppts3.pdf [file ccr-23-1030_table_s3_suppts3.pdf]

**Table S3. Grade ≥3 Adverse Events Reported in >1 Patient<sup>a</sup> [n (%)]**

|                                                 | <b>Rivoceranib<br/>N=80</b> |
|-------------------------------------------------|-----------------------------|
| Grade ≥3 adverse events reported in any patient | 64 (80.0)                   |
| Hypertension                                    | 34 (42.5)                   |
| Neutropenia <sup>b</sup>                        | 9 (11.3)                    |
| Stomatitis                                      | 6 (7.5)                     |
| Anemia                                          | 5 (6.3)                     |
| Fatigue                                         | 5 (6.3)                     |
| Pneumothorax                                    | 4 (5.0)                     |
| Back pain                                       | 4 (5.0)                     |
| Platelet count decreased                        | 3 (3.8)                     |
| Weight decreased                                | 4 (5.0)                     |
| Hypokalemia                                     | 3 (3.8)                     |
| Epistaxis                                       | 3 (3.8)                     |
| Hypoxia                                         | 3 (3.8)                     |
| Decreased appetite                              | 3 (3.8)                     |
| Dyspnea                                         | 2 (2.5)                     |
| Diarrhea                                        | 2 (2.5)                     |
| Dysphagia                                       | 2 (2.5)                     |
| Nausea                                          | 2 (2.5)                     |
| Alanine aminotransferase increased              | 2 (2.5)                     |
| Aspartate aminotransferase increased            | 2 (2.5)                     |
| Blood alkaline phosphatase increased            | 2 (2.5)                     |
| Pneumonia                                       | 2 (2.5)                     |
| Seizure                                         | 2 (2.5)                     |
| Palmar-plantar erythrodysesthesia syndrome      | 2 (2.5)                     |
| Proteinuria                                     | 2 (2.5)                     |

<sup>a</sup>Fatal adverse events occurred in 4 patients: epistaxis in 2 patients with nasal cavity tumors (nasopharynx and paranasal sinuses), one deemed related to rivoceranib per investigator; and acute respiratory failure associated with progressive disease in 2 patients; <sup>b</sup>Term includes neutropenia and neutrophil count decreased.
