# Supplementary material for: A Phase II Trial of Rivoceranib, an Oral Vascular Endothelial Growth Factor Receptor 2 Inhibitor, for Recurrent or Metastatic Adenoid Cystic Carcinoma
Source: PubMed Central journal article supplement — Clin Cancer Res. 2023 Aug 29;29(22):4555–63. doi: 10.1158/1078-0432.CCR-23-1030 (PMC10643996; doi:10.1158/1078-0432.ccr-23-1030), 2023-08-29
Supplement: ccr-23-1030_table_s4_suppts4.pdf [file ccr-23-1030_table_s4_suppts4.pdf]

**Table S4. Rivoceranib Dose Reductions**

|                                         | <b>Rivoceranib 700 mg QD<br/>N=80</b> |
|-----------------------------------------|---------------------------------------|
| Patients with any dose reduction, n (%) | 66 (82.5)                             |
| Dose reduction from 700 mg to 500 mg    | 64 (80.0)                             |
| Dose reduction from 500 mg to 300 mg    | 41 (51.3)                             |
| Dose reduction from 300 mg to 200 mg    | 26 (32.5)                             |
| 1 reduction                             | 23 (28.8)                             |
| 2 reductions                            | 18 (22.5)                             |
| 3 reductions                            | 21 (26.3)                             |
| 4 reductions                            | 4 (5.0)                               |
| Time to first dose reduction, weeks     |                                       |
| Mean (SD)                               | 7.1 (8.9)                             |
| Median (range)                          | 4.1 (1, 40)                           |

QD, once daily
