# Supplementary figures and images for: A Phase II Trial of Rivoceranib, an Oral Vascular Endothelial Growth Factor Receptor 2 Inhibitor, for Recurrent or Metastatic Adenoid Cystic Carcinoma
Source: PubMed Central journal article supplement — Clin Cancer Res. 2023 Aug 29;29(22):4555–63. doi: 10.1158/1078-0432.CCR-23-1030 (PMC10643996; doi:10.1158/1078-0432.ccr-23-1030), 2023-08-29

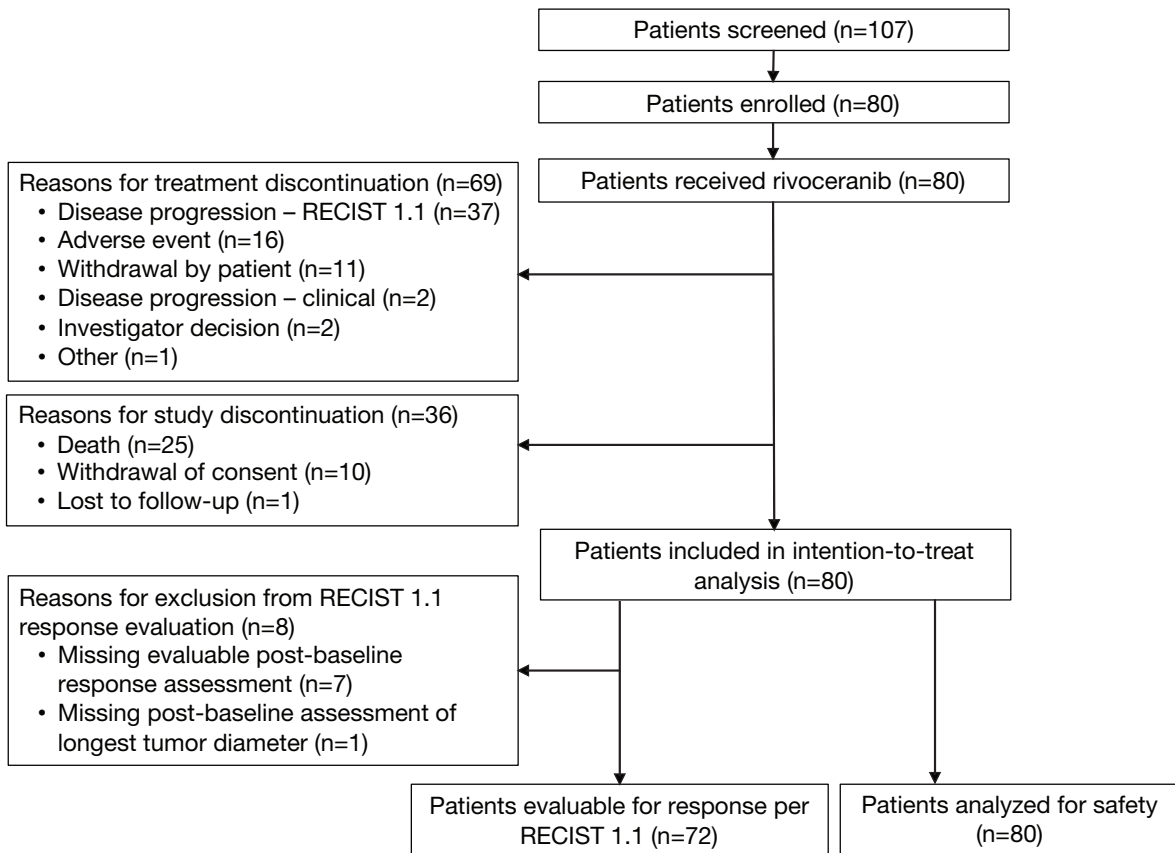

**Figure S1. Patient disposition diagram.** RECIST, response criteria in solid tumors.

Supplement: ccr-23-1030_figure_s1_suppfs1.pdf [file ccr-23-1030_figure_s1_suppfs1.pdf]
